# Supplementary material for: NHS staff mental health status in the active phase of the COVID-19 era: a staff survey in a large London hospital
Source: HighWire-hosted journal article supplement (doi:10.1136/gpsych-2020-100368), 2021-03-19
Supplement: gpsych-2020-100368supp001_data_supplement.pdf [file gpsych-2020-100368supp001_data_supplement.pdf]

**Supplementary Material 1**

## Appendix A: Questionnaire (Demographic data)

This questionnaire assesses Staff Mental Wellbeing during the active phase of the COVID-19 pandemic

The responses are anonymous it and will only take 5 mins to complete. Thank you for completing.

|     |                                                                                                                                                                                                                                                                                                                                                                                                                                                                                                                                                                                                                                                                                                                                                                                                                                                                                                                                         |
|-----|-----------------------------------------------------------------------------------------------------------------------------------------------------------------------------------------------------------------------------------------------------------------------------------------------------------------------------------------------------------------------------------------------------------------------------------------------------------------------------------------------------------------------------------------------------------------------------------------------------------------------------------------------------------------------------------------------------------------------------------------------------------------------------------------------------------------------------------------------------------------------------------------------------------------------------------------|
| 1.  | Are you:                      Female <input type="checkbox"/> Male <input type="checkbox"/>                                                                                                                                                                                                                                                                                                                                                                                                                                                                                                                                                                                                                                                                                                                                                                                                                                             |
| 2.  | Age:    20 to 29 <input type="checkbox"/> 30 to 39 <input type="checkbox"/> 40 to 49 <input type="checkbox"/> 50 to 59 <input type="checkbox"/> 60 or over <input type="checkbox"/>                                                                                                                                                                                                                                                                                                                                                                                                                                                                                                                                                                                                                                                                                                                                                     |
| 3.  | What is your ethnic group?<br>White <input type="checkbox"/> Asian/Asian British <input type="checkbox"/> Black/Black British <input type="checkbox"/> Chinese <input type="checkbox"/> Other <input type="checkbox"/>                                                                                                                                                                                                                                                                                                                                                                                                                                                                                                                                                                                                                                                                                                                  |
| 4.  | Your professional role:<br>Doctor <input type="checkbox"/> Consultant <input type="checkbox"/> Senior Fellow <input type="checkbox"/> Junior Fellow <input type="checkbox"/><br>Specialty: Surgery <input type="checkbox"/> Cardiology <input type="checkbox"/> Respiratory <input type="checkbox"/> ITU <input type="checkbox"/> Oncology <input type="checkbox"/> Imaging <input type="checkbox"/><br>Nurse <input type="checkbox"/> Senior Nurse <input type="checkbox"/> Junior Nurse <input type="checkbox"/> Healthcare assistant/Student <input type="checkbox"/><br>Other <input type="checkbox"/> (please specify): Operating Dept Practitioner <input type="checkbox"/> Physiotherapist <input type="checkbox"/> Radiographer <input type="checkbox"/><br>Perfusionist <input type="checkbox"/> Pharmacist <input type="checkbox"/> Administrator/Clerical <input type="checkbox"/> Hospital Manager <input type="checkbox"/> |
| 5.  | Place of work: ITU <input type="checkbox"/> Ward <input type="checkbox"/> Theatre <input type="checkbox"/> Office <input type="checkbox"/> Other <input type="checkbox"/> (please specify):                                                                                                                                                                                                                                                                                                                                                                                                                                                                                                                                                                                                                                                                                                                                             |
| 6.  | Have you had contact with patients who have tested positive for COVID disease:<br>Never <input type="checkbox"/> A few times <input type="checkbox"/> Frequently <input type="checkbox"/>                                                                                                                                                                                                                                                                                                                                                                                                                                                                                                                                                                                                                                                                                                                                               |
| 7.  | Have you had contact with patients who have a high clinical suspicion for COVID (but no confirmed positive results):<br>Never <input type="checkbox"/> A few times <input type="checkbox"/> Frequently <input type="checkbox"/>                                                                                                                                                                                                                                                                                                                                                                                                                                                                                                                                                                                                                                                                                                         |
| 8.  | Have you been tested for COVID disease:    Yes <input type="checkbox"/> No <input type="checkbox"/><br>Why:    Symptoms <input type="checkbox"/> Contact with someone COVID positive <input type="checkbox"/>                                                                                                                                                                                                                                                                                                                                                                                                                                                                                                                                                                                                                                                                                                                           |
| 9.  | Have you taken any time off work over last 8 weeks:    Yes <input type="checkbox"/> No <input type="checkbox"/><br>How Long: _____ days    Why (please specify): _____                                                                                                                                                                                                                                                                                                                                                                                                                                                                                                                                                                                                                                                                                                                                                                  |
| 10. | During the last 8 weeks what, if anything, has upset you the most about work during the Covid period:                                                                                                                                                                                                                                                                                                                                                                                                                                                                                                                                                                                                                                                                                                                                                                                                                                   |
