# Supplementary material for: NHS staff mental health status in the active phase of the COVID-19 era: a staff survey in a large London hospital
Source: HighWire-hosted journal article supplement (doi:10.1136/gpsych-2020-100368), 2021-03-19
Supplement: gpsych-2020-100368supp002_data_supplement.pdf [file gpsych-2020-100368supp002_data_supplement.pdf]

**Supplementary material 2**

## Appendix B: Generalised Anxiety Disorder GAD-7

| <b>Over the last 2 weeks, how often have you been bothered by the following problems?</b> | <b>Not at all</b> | <b>Several days</b> | <b>More than half the days</b> | <b>Nearly every day</b> |
|-------------------------------------------------------------------------------------------|-------------------|---------------------|--------------------------------|-------------------------|
|                                                                                           | <b>0</b>          | <b>1</b>            | <b>2</b>                       | <b>3</b>                |
| 1. Feeling nervous, anxious or on edge                                                    |                   |                     |                                |                         |
| 2. Not being able to stop or control worrying                                             |                   |                     |                                |                         |
| 3. Worrying too much about different things                                               |                   |                     |                                |                         |
| 4. Trouble relaxing                                                                       |                   |                     |                                |                         |
| 5. Being so restless that it is hard to sit still                                         |                   |                     |                                |                         |
| 6. Becoming easily annoyed or irritable                                                   |                   |                     |                                |                         |
| 7. Feeling afraid as if something awful might happen                                      |                   |                     |                                |                         |
| <b>Column totals:</b>                                                                     |                   |                     |                                |                         |
| <b>Total score:</b>                                                                       |                   |                     |                                |                         |
|                                                                                           |                   |                     |                                |                         |
