# Supplementary material for: NHS staff mental health status in the active phase of the COVID-19 era: a staff survey in a large London hospital
Source: HighWire-hosted journal article supplement (doi:10.1136/gpsych-2020-100368), 2021-03-19
Supplement: gpsych-2020-100368supp003_data_supplement.pdf [file gpsych-2020-100368supp003_data_supplement.pdf]

**Supplementary material 3**

## Appendix C: PHQ-9

| <b>Over the last 2 weeks, how often have you been bothered by the following problems?</b>                                                                                   | <b>Not at all</b> | <b>Several days</b> | <b>More than half the days</b> | <b>Nearly every day</b> |
|-----------------------------------------------------------------------------------------------------------------------------------------------------------------------------|-------------------|---------------------|--------------------------------|-------------------------|
|                                                                                                                                                                             | <b>0</b>          | <b>1</b>            | <b>2</b>                       | <b>3</b>                |
| 1. Little interest or pleasure in doing things                                                                                                                              |                   |                     |                                |                         |
| 2. Feeling down, depressed, or hopeless                                                                                                                                     |                   |                     |                                |                         |
| 3. Trouble falling or staying asleep, or sleeping too much                                                                                                                  |                   |                     |                                |                         |
| 4. Feeling tired or having little energy                                                                                                                                    |                   |                     |                                |                         |
| 5. Poor appetite or overeating                                                                                                                                              |                   |                     |                                |                         |
| 6. Feeling bad about yourself — or that you are a failure or have let yourself or your family down                                                                          |                   |                     |                                |                         |
| 7. Trouble concentrating on things, such as reading the newspaper or watching television                                                                                    |                   |                     |                                |                         |
| 8. Moving or speaking so slowly that other people could have noticed? Or the opposite — being so fidgety or restless that you have been moving around a lot more than usual |                   |                     |                                |                         |
| 9. Thoughts that you would be better off dead or of hurting yourself in some way                                                                                            |                   |                     |                                |                         |
| <b>Column Totals</b>                                                                                                                                                        |                   |                     |                                |                         |
| <b>Total Score</b>                                                                                                                                                          |                   |                     |                                |                         |
